# Supplementary material for: Multiple genome-wide association studies of type 2 diabetes implicate several genes are associated with diabetic retinopathy based on UK Biobank
Source: bioRxiv or medRxiv preprint supplement (doi:10.1101/2023.12.02.23299320), 2023-12-03
Supplement: Supplementary file [file media-1.zip]

QQ plot of GWAS(+HbA1c)

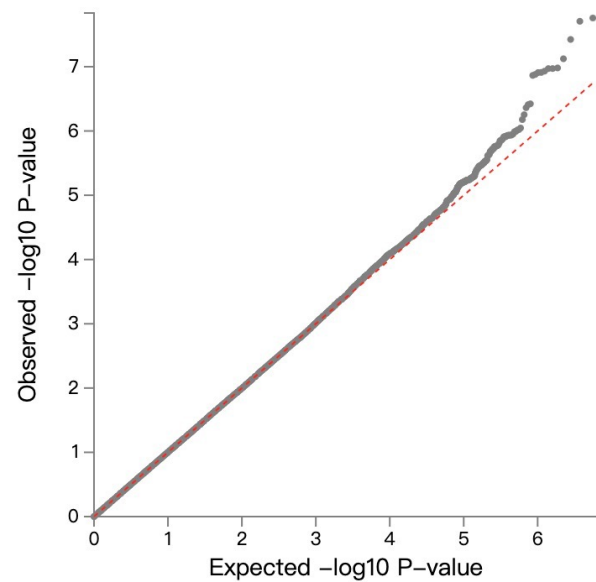

QQ plot of primary GWAS(DoD>Q2)

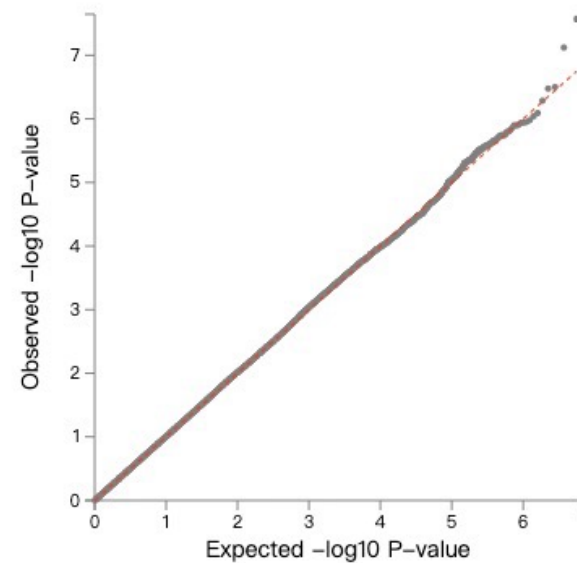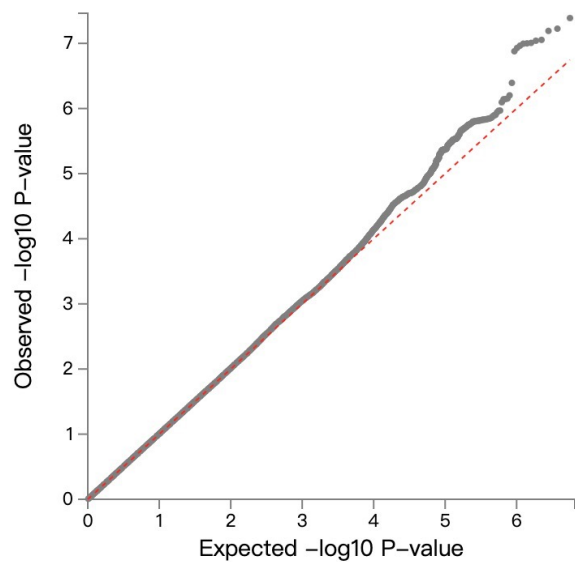

QQ plot of GWAS(+Urea)

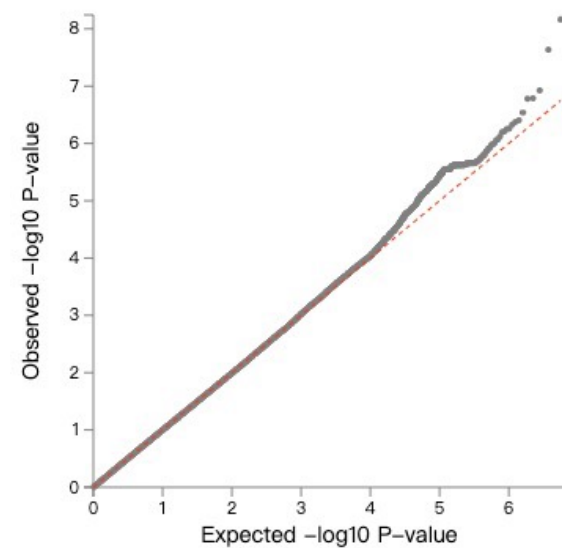

QQ plot of GWAS(HbA1c>Q3)
