# Supplementary material for: Multiple genome-wide association studies of type 2 diabetes implicate several genes are associated with diabetic retinopathy based on UK Biobank
Source: bioRxiv or medRxiv preprint supplement (doi:10.1101/2023.12.02.23299320), 2023-12-03

The QQ plot of primary GWAS

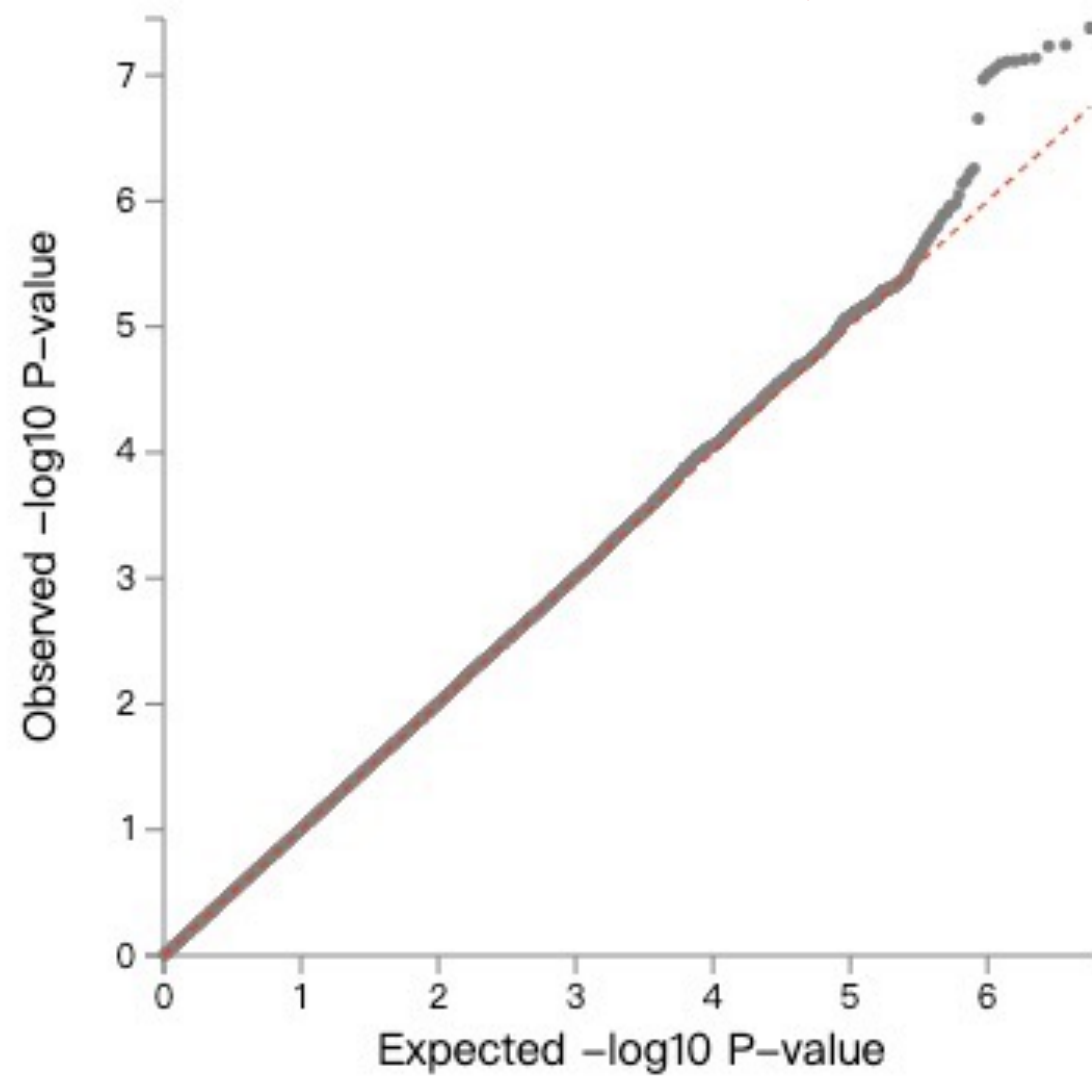

Supplement: Supplementary file [file media-1.zip]
